## Cancer Risks in Patients Treated With Growth Hormone in Childhood: The SAGhE European Cohort Study

Anthony J. Swerdlow,<sup>1,2</sup> Rosie Cooke,<sup>1</sup> Dominique Beckers,<sup>3,4</sup> Birgit Borgström,<sup>5</sup> Gary Butler,<sup>6,7</sup> Jean-Claude Carel,<sup>8,9</sup> Stefano Cianfarani,<sup>10,11</sup> Peter Clayton,<sup>12,13</sup> Joël Coste,<sup>14,15</sup> Annalisa Deodati,<sup>10</sup> Emmanuel Ecosse,<sup>14,15</sup> Ruth Gausche,<sup>16</sup> Claudio Giacomozzi,<sup>17</sup> Anita C.S. Hokken-Koelega,<sup>18,19</sup> Aysha J. Khan,<sup>12,13</sup> Wieland Kiess,<sup>16</sup> Claudia E. Kuehni,<sup>20</sup> Primus-E. Mullis,<sup>21</sup> Roland Pfaffle,<sup>16</sup> Lars Säwendahl,<sup>11</sup> Grit Sommer,<sup>20</sup> Muriel Thomas,<sup>4</sup> Anders Tidblad,<sup>11</sup> Sally Tollerfield,<sup>6</sup> Liesbet Van Eycken,<sup>22</sup> and Gladys R.J. Zandwijken<sup>18,19</sup>

<sup>1</sup>Division of Genetics and Epidemiology, Institute of Cancer Research, London SW7 3RP, United Kingdom; <sup>2</sup>Division of Breast Cancer Research, Institute of Cancer Research, London SW7 3RP, United Kingdom; <sup>3</sup>Unité d'Endocrinologie Pédiatrique, CHU NAMUR, Université Catholique de Louvain, 5530 Yvoir, Belgium; <sup>4</sup>Belgian Society for Pediatric Endocrinology and Diabetology, 1200 Brussels, Belgium; <sup>5</sup>Department of Clinical Science, Intervention, and Technology, Karolinska Institutet, SE-141 86 Stockholm, Sweden; <sup>6</sup>University College London, Great Ormond Street Institute for Child Health, London WC1N 1EH, United Kingdom; <sup>7</sup>University College London Hospitals, National Health Service Foundation Trust, London NW1 2PG, United Kingdom; <sup>8</sup>Assistance Publique-Hôpitaux de Paris (AP-HP), Hôpital Universitaire Robert-Debré, Department of Pediatric Endocrinology and Diabetology, and Centre de Référence des Maladies Endocriniennes Rares de la Croissance, F-75019 Paris, France; <sup>9</sup>PROTECT, Institut National de la Santé et de la Recherche Médicale (INSERM), Université Paris Diderot, Sorbonne Paris Cité, F-75019 Paris, France; <sup>10</sup>Dipartimento Pediatrico Universitario Ospedaliero "Bambino Gesù" Children's Hospital-Tor Vergata University, 00165 Rome, Italy; <sup>11</sup>Department of Women's and Children's Health, Karolinska Institutet, SE-141 86 Stockholm, Sweden; <sup>12</sup>Royal Manchester Children's Hospital, Central Manchester University Hospitals, National Health Service Foundation Trust, Manchester Academic Health Science Centre, Manchester M13 9WL, United Kingdom; <sup>13</sup>School of Medical Sciences, Faculty of Biology, Medicine and Health, Manchester M13 9PL, United Kingdom; <sup>14</sup>Biostatistics and Epidemiology Unit, Hôtel Dieu, Assistance Publique-Hôpitaux de Paris, 1 Parvis Notre-Dame, 75004 Paris, France; <sup>15</sup>Equipe d'accueil 4360, University Paris Descartes, Sorbonne Paris Cité, 75005 Paris, France; <sup>16</sup>Hospital for Children and Adolescents and Centre of Pediatric Research, University of Leipzig, Liebigstr. 20a, D-04103 Leipzig, Germany; <sup>17</sup>Centre for Pediatric Endocrinology and Diabetes, Pediatric Unit, Carlo Poma Hospital, 46100 Mantua, Italy; <sup>18</sup>Dutch Growth Research Foundation, Westzeedijk 106, 3016 AH Rotterdam, The Netherlands; <sup>19</sup>Department of Pediatrics, Subdivision of Endocrinology, Erasmus Medical Center/Sophia Children's Hospital, Wytemaweg 80, 3015 CN Rotterdam, The Netherlands; <sup>20</sup>Institute of Social and Preventive Medicine, University of Bern, Finkenhubelweg 11, 3012 Bern, Switzerland; <sup>21</sup>Division of Paediatric Endocrinology, Diabetology and Metabolism, University Children's Hospital Bern, Inselspital, 3010 Bern, Switzerland; and <sup>22</sup>Belgian Cancer Registry, Department Research, Koningsstraat 215, Box 7–B-1210 Brussels, Belgium

**Context:** Growth hormone (GH) is prescribed for an increasing range of indications, but there has been concern that it might raise cancer risk. Published data are limited.

**Objective:** To examine cancer risks in relation to GH treatment.

**Design:** Cohort study.

**Setting:** Population-based.

ISSN Print 0021-972X ISSN Online 1945-7197

Printed in USA

Copyright © 2017 Endocrine Society

This article has been published under the terms of the Creative Commons Attribution License (CC BY; <https://creativecommons.org/licenses/by/4.0/>).

Received 4 May 2016. Accepted 26 January 2017.

First Published Online 10 February 2017

Abbreviations: CI, confidence interval; CNS, central nervous system; GH, growth hormone; HL, Hodgkin lymphoma; IGF, insulin-like growth factor; r-hGH, recombinant human growth hormone; SAGhE, Safety and Appropriateness of Growth Hormone Treatments in Europe; SIR, standardized incidence ratio.

**Patients:** Cohort of 23,984 patients treated with recombinant human GH (r-hGH) in eight European countries since this treatment was first used in 1984. Cancer expectations from country-specific national population statistics.

**Main Outcome Measures:** Cancer incidence and cancer mortality.

**Results:** Incidence and mortality risks in the cohort were raised for several cancer sites, largely consequent on second primary malignancies in patients given r-hGH after cancer treatment. There was no clear raised risk in patients with growth failure without other major disease. Only for bone and bladder cancers was incidence significantly raised in GH-treated patients without previous cancer. Cancer risk was unrelated to duration or cumulative dose of r-hGH treatment, but for patients treated after previous cancer, cancer mortality risk increased significantly with increasing daily r-hGH dose ( $P$  trend < 0.001). Hodgkin lymphoma (HL) incidence increased significantly with longer follow-up ( $P$  trend = 0.001 for patients overall and 0.002 for patients without previous cancer).

**Conclusions:** Our results do not generally support a carcinogenic effect of r-hGH, but the unexplained trend in cancer mortality risk in relation to GH dose in patients with previous cancer, and the indication of possible effects on bone cancer, bladder cancer, and HL risks, need further investigation. (*J Clin Endocrinol Metab* 102: 1661–1672, 2017)

Growth hormone (GH) has been prescribed since 1957 to treat GH deficiency and short stature due to other causes. The hormone used was initially extracted from human pituitaries (p-hGH), but after an outbreak of Creutzfeldt–Jakob disease consequent on prion infection from these pituitaries, this was discontinued in 1985 and all subsequent treatment has been with recombinant human growth hormone (r-hGH).

GH raises serum concentrations of insulin-like growth factor (IGF)-1, which is mitogenic and antiapoptotic *in vitro*, and adult levels of which have been associated in most studies with risks of subsequent breast, colorectal, and prostate cancers and in some studies with other cancers (1, 2). Furthermore, cohort studies of patients with endogenously raised GH concentrations, acromegaly, have found raised risks of several cancers, most consistently colorectal (3, 4). Potential effects on leukemia (5, 6) and other malignancy (1) risks have been suggested, and second primary malignancy risk has been shown raised in patients receiving GH after childhood cancer (7, 8). Although these data give suspicion that there might be carcinogenic effects, no risks have been shown consistently or established. Cohort studies of r-hGH treatment have either comprised at most a few hundred patients (7, 9) or been conducted by pharmaceutical companies (10–14) with too short follow-up to cover the likely lag period of carcinogenesis, and there has been an absence of dose- and duration-response data. We therefore assembled a large cross-European cohort, the Safety and Appropriateness of Growth Hormone Treatments in Europe (SAGhE) study, with follow-up and analysis independent of pharmaceutical companies, to examine whether treatment with r-hGH affects cancer incidence and mortality risks in patients who have taken this treatment.

## Materials and Methods

In each of eight European countries (Table 1), we assembled cohorts of patients treated with r-hGH at pediatric ages since such treatment was first used in that country (1984 to 1986, depending on the country) and never treated with p-hGH. Data on demographic and GH-related variables were extracted from existing databases and case notes. Subjects were followed for mortality and cancer incidence via national population-based registries in Belgium, the Netherlands, Sweden, and the United Kingdom and by a range of methods in the other four countries. Details are given in (15).

In each country, appropriate ethics committee agreement was obtained. For all patients, either we obtained written informed consent or an ethics committee decided that consent was not required.

In Belgium, France, the Netherlands, Sweden, and the United Kingdom, the cohorts were national and population-based, or virtually so, whereas in Switzerland, Germany, and Italy, they were mainly clinic-based and subnational. Vital status follow-up was highly complete except for uncertainty on this in France and Italy (15). Cancer incidence follow-up based on cancer registration was highly complete in Belgium, the Netherlands, Sweden, Switzerland, and the United Kingdom, but less complete in France, Germany, and Italy, where there was no national cancer registration. We therefore restricted cancer incidence risk calculations to the former five countries (15) and present numbers of cancers from the latter three in the Supplemental Data.

Because certain rare conditions (*e.g.*, neurofibromatosis) that lead to GH therapy are themselves strong predisposing factors for cancer, we followed previous practice (11, 12, 16) in excluding individuals with such conditions (listed in Supplemental Data) from analysis.

## Statistical analysis

We calculated person-years at risk for cancer incidence and mortality and used these with national population rates to calculate standardized mortality ratios, standardized incidence ratios (SIRs), absolute excess rates, and trends in risk (17) by standard methods, as detailed in the Supplemental Data. The analyses investigated risks of all primary

**Table 1. The SAGhE Cohort: Descriptive Variables**

| Characteristic                           | Mortality Cohort <sup>a</sup> |       | Cancer Incidence Cohort <sup>a</sup> |       |
|------------------------------------------|-------------------------------|-------|--------------------------------------|-------|
|                                          | n                             | %     | n                                    | %     |
| Sex                                      |                               |       |                                      |       |
| Male                                     | 13,268                        | 55.3  | 11,002                               | 54.2  |
| Female                                   | 10,716                        | 44.7  | 9312                                 | 45.8  |
| Country                                  |                               |       |                                      |       |
| Belgium                                  | 1363                          | 5.7   | 1327                                 | 6.5   |
| France                                   | 10,202                        | 42.5  | 8614                                 | 42.4  |
| Germany                                  | 1779                          | 7.4   | 558                                  | 2.7   |
| Italy                                    | 1361                          | 5.7   | 736                                  | 3.6   |
| The Netherlands                          | 1746                          | 7.3   | 1685                                 | 8.3   |
| Sweden                                   | 2955                          | 12.3  | 2822                                 | 13.9  |
| Switzerland                              | 743                           | 3.1   | 737                                  | 3.6   |
| United Kingdom                           | 3835                          | 16.0  | 3835                                 | 18.9  |
| Age started GH treatment (y)             |                               |       |                                      |       |
| 0–4                                      | 2008                          | 8.4   | 1801                                 | 8.9   |
| 5–9                                      | 7665                          | 32.0  | 6535                                 | 32.2  |
| 10–14                                    | 12,136                        | 50.6  | 10,181                               | 50.1  |
| 15–19                                    | 2175                          | 9.1   | 1797                                 | 8.8   |
| Year started GH treatment                |                               |       |                                      |       |
| <1990                                    | 5239                          | 21.8  | 4685                                 | 23.1  |
| 1990–1994                                | 10,394                        | 43.3  | 9264                                 | 45.6  |
| 1995–1999                                | 5796                          | 24.2  | 4598                                 | 22.6  |
| ≥2000                                    | 2555                          | 10.7  | 1766                                 | 8.7   |
| Diagnosis leading to GH treatment        |                               |       |                                      |       |
| CNS tumor                                | 2221                          | 9.3   | 1357                                 | 6.7   |
| Non-CNS solid tumor                      | 151                           | 0.6   | 100                                  | 0.5   |
| Hematological malignancy                 | 730                           | 3.0   | 428                                  | 2.1   |
| Chronic renal failure and renal diseases | 288                           | 1.2   | 155                                  | 0.8   |
| Turner syndrome                          | 3503                          | 14.6  | 3189                                 | 15.7  |
| Other syndromes and chronic diseases     | 1446                          | 6.0   | 1264                                 | 6.2   |
| Multiple pituitary hormone deficiency    | 2497                          | 10.4  | 2261                                 | 11.1  |
| Skeletal dysplasias                      | 358                           | 1.5   | 337                                  | 1.7   |
| Isolated growth failure <sup>b</sup>     | 12,468                        | 52.0  | 11,062                               | 54.5  |
| Nonclassifiable                          | 322                           | 1.3   | 161                                  | 0.8   |
| Total                                    | 23,984                        | 100.0 | 20,314 <sup>c</sup>                  | 100.0 |

Abbreviation: CNS, central nervous system.

<sup>a</sup>Subjects included in follow-up for mortality, and for cancer incidence, excluding “high risk” initial diagnoses (see Methods).

<sup>b</sup>Including isolated GH deficiency, idiopathic short stature, and prenatal growth failure (small for gestational age).

<sup>c</sup>A total of 10,406 of these subjects were from Belgium, the Netherlands, Sweden, Switzerland, and the United Kingdom and are included in the person to years–based analyses of cancer incidence risk presented in Tables 2 through 5 and Supplemental Tables 1 and 2; 9908 are from France, Germany, and Italy and are presented in the Supplemental data for the reasons specified in the Methods.

malignancies except nonmelanoma skin cancer, for which cancer registration tends to be highly incomplete. All *P* values are two sided.

## Results

After exclusions for high-risk diagnoses, data unavailability and lack of permission (see Supplemental Data and Fig. 1), the cohort for mortality risk analyses comprised 23,984 patients and for cancer incidence 10,406 patients. (For a further 9908 from France, Germany, and Italy, incident cancers are reported in the Supplemental Data, but risks are not analyzed; see Methods). Half the cohort was first treated at ages 10 to 14, and about half received GH for isolated growth failure (Table 1).

Follow-up for mortality totaled 396,344 person-years, an average of 16.5 years per patient, and for cancer incidence, 154,371 person-years, averaging 14.8 years per patient. The mean age at the end of follow-up was 27.1 years for the cancer mortality analyses and 25.8 years for the incidence analyses. There were 251 cancer deaths in the cohort and 137 incident cancers in the countries for which incidence risk was analyzed.

### Cancer risks in the cohort overall

Cancer mortality in the cohort overall was over 13-fold raised, and cancer incidence risk doubled (Table 2). Absolute excess rates were 5.9 [95% confidence interval (CI), 5.1 to 6.7] for cancer mortality and 4.8 (95% CI, 3.4 to 6.4) for cancer incidence. There was significantly

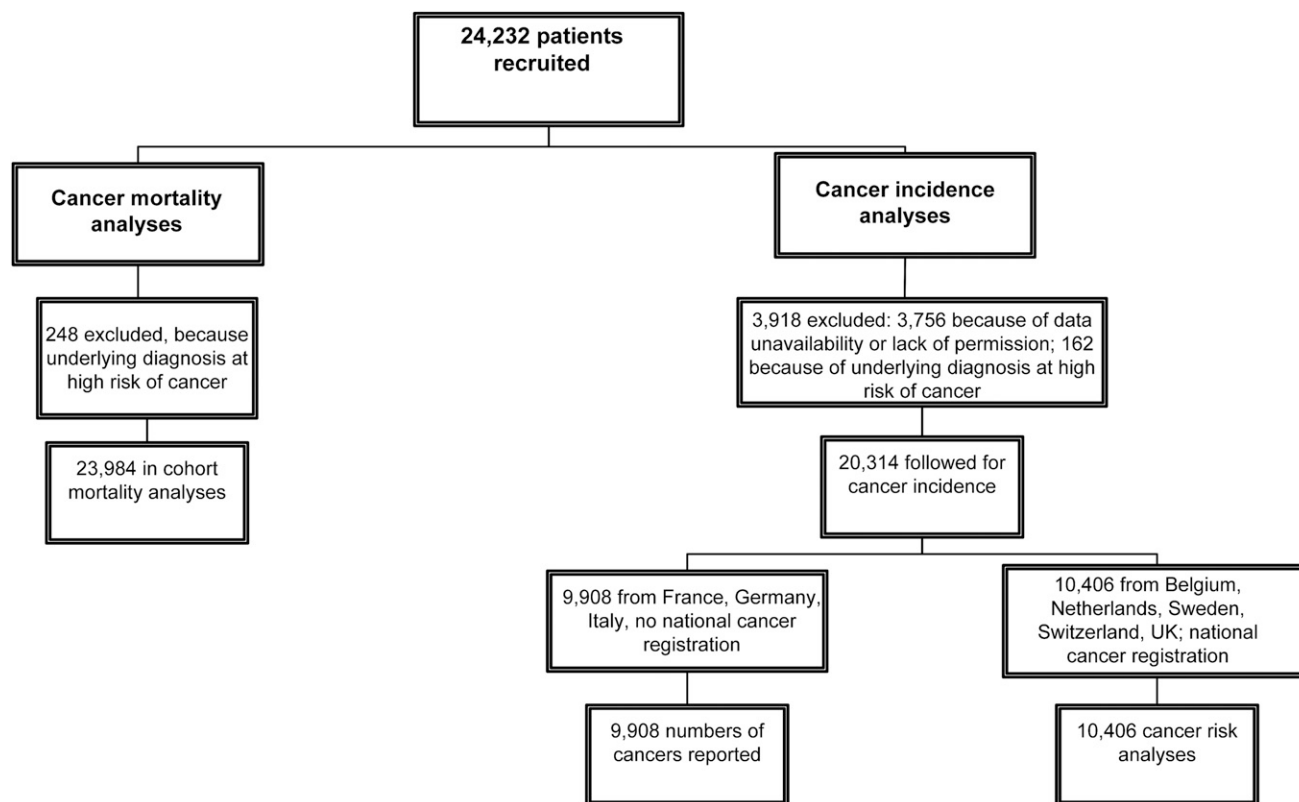

**Figure 1.** Numbers of patients recruited, excluded, and analyzed, SAGhE cohort.

raised risk of both cancer mortality and incidence for cancers of the bone, kidney, central nervous system (CNS), and thyroid and significantly raised risks based on  $>1$  case for mortality from tongue, mouth, and pharynx cancer; soft tissue cancer; non-Hodgkin lymphoma (non-HL) and leukemia; and incidence of melanoma and ovarian and bladder cancers. With the exception of bone and bladder cancers, these raised risks were essentially a consequence of risks in patients whose original diagnosis leading to GH treatment was cancer. In patients treated after cancer, there was additionally a significantly raised risk based on  $>1$  case for colorectal cancer incidence. Risk estimates for the major adult cancers (*e.g.*, breast, lung, and prostate) had wide CIs, based on few person-years of follow-up.

### Risks by underlying diagnosis

In patients whose initial diagnosis was “isolated growth failure” (*i.e.*, growth failure without other major disease: isolated GH deficiency, idiopathic short stature, and prenatal growth failure), overall cancer risk was not raised and there were no significantly raised site-specific risks, based on small numbers of cases (Table 3). For patients whose initial diagnosis was not isolated growth failure or cancer, there were significantly raised risks of cancer incidence (SIR = 1.4; 95% CI, 1.1 to 1.9) and mortality (standardized mortality ratio = 2.2; 95% CI,

1.3 to 3.7) overall, and of bone (SIR = 4.1; 95% CI, 1.3 to 12.6) and bladder (SIR = 27.8; 95% CI, 7.0 to 111.3) cancer incidence, reflecting cases after several different initial diagnoses, with no obvious common factor, although based on small numbers for each cancer site.

### Risks by demographic characteristics and GH treatment variables

Cancer risks in the cohort were similar in males and females (Table 4). Risks varied over twofold between countries, paralleling approximately the proportions of subjects in these countries who had cancer as their initial diagnosis (15). Cancer risk did not relate to age at starting r-hGH treatment. For cancer mortality but not incidence, risk decreased with longer duration since starting treatment, and for cancer mortality especially, risk decreased with longer duration of treatment. The effect of duration of treatment disappeared for cancer incidence ( $P = 0.72$ ) and greatly diminished for cancer mortality ( $P = 0.04$ ) when we censored from analysis the person-time during treatment plus the first 2 years after ending treatment (not in Tables 1 through 5), suggesting that it had been an artifact of cessations of treatment because of cancer occurrence. Risk of cancer incidence but not mortality decreased with increasing mean GH dose, and both incidence and mortality risks tended to diminish with cumulative dose.

**Table 2. Cancer Mortality and Incidence Risks, SAGhE Cohort, by Site and Initial Diagnosis Leading to GH Treatment**

| ICD 10, C code          | Outcome<br>Cancer site <sup>a</sup>      | All Initial Diagnoses |                              |                               |                      | Initial Diagnosis Cancer |                              |                               |                         | Initial Diagnosis Noncancer |                              |                               |                      |
|-------------------------|------------------------------------------|-----------------------|------------------------------|-------------------------------|----------------------|--------------------------|------------------------------|-------------------------------|-------------------------|-----------------------------|------------------------------|-------------------------------|----------------------|
|                         |                                          | Cancer Mortality      |                              | Cancer Incidence <sup>c</sup> |                      | Cancer Mortality         |                              | Cancer Incidence <sup>c</sup> |                         | Cancer Mortality            |                              | Cancer Incidence <sup>c</sup> |                      |
|                         |                                          | n                     | SMR <sup>b</sup><br>(95% CI) | n                             | SIR<br>(95% CI)      | n                        | SMR <sup>b</sup><br>(95% CI) | n                             | SIR<br>(95% CI)         | n                           | SMR <sup>b</sup><br>(95% CI) | n                             | SIR<br>(95% CI)      |
| 01–14                   | Tongue, mouth, pharynx                   | 3                     | 6.8<br>(2.2–21.2)*           | 1                             | 1.4<br>(0.0–7.5)     | 2                        | 24.2<br>(6.1–96.8)**         | 1                             | 7.9<br>(0.2–43.8)       | 1                           | 2.8<br>(0.1–15.7)            | 0                             | 0.0<br>(0.0–6.0)     |
| 18–21                   | Colon and rectum                         | 2                     | 3.6<br>(0.9–14.6)            | 4                             | 2.3<br>(0.9–6.2)     | 1                        | 14.7<br>(0.4–81.7)           | 2                             | 7.4<br>(1.9–29.7)*      | 1                           | 2.1<br>(0.1–11.6)            | 2                             | 1.4<br>(0.3–5.6)     |
| 25                      | Pancreas                                 | 1                     | 7.7<br>(0.2–42.6)            | 0                             | 0.0<br>(0.0–28.0)    | 1                        | 61.6<br>(1.6–343.4)*         | 0                             | 0.0<br>(0.0–182.7)      | 0                           | 0.0<br>(0.0–32.2)            | 0                             | 0.0<br>(0.0–33.1)    |
| 33–34                   | Lung                                     | 1                     | 1.9<br>(0.1–10.9)            | 1                             | 2.6<br>(0.1–14.5)    | 0                        | 0.0<br>(0.0–62.2)            | 0                             | 0.0<br>(0.0–57.0)       | 1                           | 2.2<br>(0.1–12.3)            | 1                             | 3.1<br>(0.4–22.2)    |
| 40–41                   | Bone                                     | 12                    | 6.9<br>(3.9–12.1)***         | 9                             | 5.2<br>(2.7–10.1)*** | 8                        | 35.5<br>(17.7–70.9)***       | 5                             | 17.2<br>(7.2–41.4)***   | 4                           | 2.6<br>(1.0–7.0)             | 4                             | 2.8<br>(1.1–7.5)*    |
| 43                      | Melanoma                                 | 1                     | 1.4<br>(0.0–8.0)             | 12                            | 2.1<br>(1.2–3.8)*    | 0                        | 0.0<br>(0.0–41.4)            | 5                             | 5.8<br>(2.4–13.9)**     | 1                           | 1.7<br>(0.0–9.2)             | 7                             | 1.5<br>(0.7–3.1)     |
| 47–49                   | Soft tissue                              | 5                     | 5.9<br>(2.5–14.2)**          | 4                             | 2.7<br>(1.0–7.2)     | 5                        | 47.2<br>(19.7–113.4)***      | 2                             | 8.5<br>(2.1–33.9)*      | 0                           | 0.0<br>(0.0–5.0)             | 2                             | 1.6<br>(0.4–6.4)     |
| 50                      | Breast                                   | 1                     | 1.9<br>(0.1–10.4)            | 2                             | 0.9<br>(0.2–3.4)     | 1                        | 16.9<br>(0.4–94.1)           | 1                             | 3.0<br>(0.1–16.6)       | 0                           | 0.0<br>(0.0–7.7)             | 1                             | 0.5<br>(0.0–2.8)     |
| 51                      | Vulva                                    | 0                     | 0.0<br>(0.0–1749.0)          | 1                             | 5.0<br>(0.1–27.8)    | 0                        | 0.0<br>(0.0–9281.9)          | 0                             | 0.0<br>(0.0–141.6)      | 0                           | 0.0<br>(0.0–2155.1)          | 1                             | 5.7<br>(0.2–31.9)    |
| 53                      | Cervix                                   | 0                     | 0.0<br>(0.0–18.8)            | 17                            | 0.9<br>(0.6–1.5)     | 0                        | 0.0<br>(0.0–128.6)           | 2                             | 0.8<br>(0.2–3.2)        | 0                           | 0.0<br>(0.0–22.0)            | 15                            | 0.9<br>(0.6–1.5)     |
| 54–55                   | Corpus uteri                             | 1                     | 24.3<br>(0.6–135.4)          | 0                             | 0.0<br>(0.0–35.4)    | 1                        | 259.7<br>(6.6–1446.7)**      | 0                             | 0.0<br>(0.0–240.9)      | 0                           | 0.0<br>(0.0–98.9)            | 0                             | 0.0<br>(0.0–41.4)    |
| 56                      | Ovary                                    | 1                     | 4.2<br>(0.1–23.4)            | 4                             | 3.0<br>(1.1–7.9)*    | 1                        | 39.7<br>(1.0–221.2)*         | 3                             | 14.8<br>(4.8–45.9)**    | 0                           | 0.0<br>(0.0–17.4)            | 1                             | 0.9<br>(0.0–4.9)     |
| 61                      | Prostate                                 | 1                     | 50.7<br>(1.3–282.3)*         | 0                             | 0.0<br>(0.0–174.7)   | 0                        | 0.0<br>(0.0–1622.2)          | 0                             | 0.0<br>(0.0–850.4)      | 1                           | 57.3<br>(1.5–319.1)*         | 0                             | 0.0<br>(0.0–219.8)   |
| 62                      | Testis                                   | 0                     | 0.0<br>(0.0–13.0)            | 7                             | 1.2<br>(0.6–2.4)     | 0                        | 0.0<br>(0.0–99.8)            | 3                             | 2.7<br>(0.9–8.5)        | 0                           | 0.0<br>(0.0–15.0)            | 4                             | 0.8<br>(0.3–2.2)     |
| 64–66                   | Kidney                                   | 2                     | 13.8<br>(3.5–437.5)*         | 3                             | 6.8<br>(2.2–21.2)*   | 2                        | 138.1<br>(34.5–552.0)***     | 3                             | 44.1<br>(14.2–136.8)*** | 0                           | 0.0<br>(0.0–28.4)            | 0                             | 0.0<br>(0.0–10.0)    |
| 67–68                   | Bladder                                  | 1                     | 11.7<br>(0.3–65.0)           | 3                             | 14.0<br>(4.5–43.4)** | 0                        | 0.0<br>(0.0–397.0)           | 0                             | 0.0<br>(0.0–123.2)      | 1                           | 13.1<br>(0.3–72.9)           | 3                             | 16.3<br>(5.2–50.4)** |
| 70–72                   | CNS                                      | 156                   | 45.8<br>(39.2–53.6)***       | 29                            | 6.5<br>(4.5–9.4)***  | 153                      | 373.4<br>(318.6–437.5)***    | 23                            | 34.7<br>(23.1–52.2)***  | 3                           | 1.0<br>(0.3–3.1)             | 6                             | 1.6<br>(0.7–3.5)     |
| 73                      | Thyroid                                  | 1                     | 54.6<br>(1.4–304.2)*         | 12                            | 6.0<br>(3.4–10.5)*** | 1                        | 496.6<br>(12.6–2767.0)**     | 10                            | 32.2<br>(17.3–59.8)***  | 0                           | 0.0<br>(0.0–226.3)           | 2                             | 1.2<br>(0.3–4.7)     |
| 81                      | HL                                       | 0                     | 0.0<br>(0.0–6.4)             | 8                             | 1.8<br>(0.9–3.6)     | 0                        | 0.0<br>(0.0–50.7)            | 1                             | 1.3<br>(0.0–7.2)        | 0                           | 0.0<br>(0.0–7.4)             | 7                             | 1.9<br>(0.9–4.0)     |
| 82–85, 96               | Non-HL                                   | 4                     | 3.4<br>(1.3–9.0)*            | 3                             | 1.3<br>(0.4–4.2)     | 4                        | 26.8<br>(10.1–71.4)***       | 1                             | 2.6<br>(0.1–14.4)       | 0                           | 0.0<br>(0.0–3.6)             | 2                             | 1.1<br>(0.3–4.3)     |
| 91–95                   | Leukemia                                 | 27                    | 6.4<br>(4.4–9.4)***          | 7                             | 2.2<br>(1.0–4.6)     | 23                       | 45.5<br>(30.2–68.5)***       | 4                             | 7.7<br>(2.9–20.4)**     | 4                           | 1.1<br>(0.4–2.9)             | 3                             | 1.1<br>(0.4–3.5)     |
| 00–43, 45, 47–85, 89–97 | All sites except nonmelanoma skin cancer | 251                   | 13.7<br>(12.1–15.5)***       | 138                           | 2.2<br>(1.9–2.6)***  | 230                      | 101.9<br>(89.6–116.0)***     | 72                            | 7.6<br>(6.1–9.6)***     | 21                          | 1.3<br>(0.9–2.0)             | 66                            | 1.2<br>(1.0–1.6)     |

Abbreviations: ICD = International Classification of Diseases; SMR, standardized mortality ratio.

<sup>a</sup>The sites selected are those for which any cancer deaths or incident cases occurred.

<sup>b</sup>Using Swiss rates as expected for Germany and Belgian rates as expected for both France and the Netherlands for cancer sites for which sufficient detail was not available from home-country national rates.

<sup>c</sup>Excluding France, Germany, and Italy.

\* $P < 0.05$ ; \*\* $P < 0.01$ ; \*\*\* $P < 0.001$ .

Examining these risks within the patients whose initial diagnosis was cancer (Table 4), the only indications of different patterns from those listed previously were that incidence as well as mortality decreased with duration since starting treatment and duration of treatment, cumulative GH dose did not significantly affect mortality or incidence, and mortality but not incidence increased highly significantly ( $P < 0.001$ ) with increasing mean GH dose. For patients whose initial diagnosis was not cancer, neither cancer mortality nor incidence was significantly related to any of the treatment variables. The diminutions in risk seen with mean GH dose and cumulative dose for

cohort members overall were at least in part due to confounding by initial diagnosis: Patients with initial noncancer diagnoses tended to have received greater mean and cumulative GH doses than did cancer patients (e.g., 33% of noncancer patients but only 17% of cancer patients received doses of  $\geq 30$   $\mu\text{g}/\text{kg}/\text{d}$ ). Analyses separately for patients with isolated growth failure, and for those with Turner syndrome (Supplemental Table 1), showed significant rising incidence risks with time since first treatment and with duration of treatment (both  $P = 0.02$ ) for isolated growth failure patients, but otherwise no significant risks for incidence or mortality.

**Table 3. Cancer Mortality and Incidence Risks, SAGhE Cohort, for Patients in Whom a Noncancer Diagnosis Led to GH Treatment**

| Outcome<br>(Cancer Site)                       | Initial Diagnosis IGF |                 |                  |                | Initial Diagnosis Noncancer, Non-IGF |                  |                  |                    |
|------------------------------------------------|-----------------------|-----------------|------------------|----------------|--------------------------------------|------------------|------------------|--------------------|
|                                                | Cancer Mortality      |                 | Cancer Incidence |                | Cancer Mortality                     |                  | Cancer Incidence |                    |
|                                                | n                     | SMR (95% CI)    | n                | SIR (95% CI)   | n                                    | SMR (95% CI)     | n                | SIR (95% CI)       |
| Colon and rectum                               | 0                     | 0.0 (0.0–12.1)  | 0                | 0.0 (0.0–5.2)  | 1                                    | 5.7 (0.1–31.8)   | 2                | 2.7 (0.7–10.9)     |
| Bone                                           | 3                     | 3.1 (1.0–9.6)   | 1                | 1.4 (0.0–8.0)  | 1                                    | 1.8 (0.1–10.1)   | 3                | 4.1 (1.3–12.6)*    |
| Melanoma                                       | 1                     | 2.6 (0.1–14.5)  | 3                | 1.5 (0.5–4.5)  | 0                                    | 0.0 (0.0–16.7)   | 4                | 1.5 (0.6–4.0)      |
| Soft tissue                                    | 0                     | 0.0 (0.0–8.2)   | 0                | 0.0 (0.0–6.0)  | 0                                    | 0.0 (0.0–12.7)   | 2                | 3.1 (0.8–12.6)     |
| Cervix                                         | 0                     | 0.0 (0.0–64.4)  | 7                | 1.1 (0.5–2.4)  | 0                                    | 0.0 (0.0–33.4)   | 8                | 0.8 (0.4–1.6)      |
| Testis                                         | 0                     | 0.0 (0.0–19.7)  | 3                | 1.0 (0.3–3.0)  | 0                                    | 0.0 (0.0–62.3)   | 1                | 0.5 (0.0–3.0)      |
| Bladder                                        | 0                     | 0.0 (0.0–83.4)  | 1                | 8.9 (0.2–49.4) | 1                                    | 31.0 (0.8–172.9) | 2                | 27.8 (7.0–111.3)** |
| CNS                                            | 0                     | 0.0 (0.0–2.0)   | 3                | 1.6 (0.5–4.8)  | 3                                    | 2.6 (0.8–8.0)    | 3                | 1.6 (0.5–5.1)      |
| Thyroid                                        | 0                     | 0.0 (0.0–371.7) | 0                | 0.0 (0.0–5.5)  | 0                                    | 0.0 (0.0–578.6)  | 2                | 2.0 (0.5–7.8)      |
| HL                                             | 0                     | 0.0 (0.0–11.5)  | 3                | 1.7 (0.6–5.4)  | 0                                    | 0.0 (0.0–20.3)   | 4                | 2.0 (0.8–5.4)      |
| Non-HL                                         | 0                     | 0.0 (0.0–5.5)   | 0                | 0.0 (0.0–3.9)  | 0                                    | 0.0 (0.0–10.5)   | 2                | 2.2 (0.6–8.8)      |
| Leukemia                                       | 2                     | 0.8 (0.2–3.4)   | 1                | 0.8 (0.0–4.2)  | 2                                    | 1.5 (0.4–6.1)    | 2                | 1.5 (0.4–5.9)      |
| All sites except<br>nonmelanoma<br>skin cancer | 8                     | 0.8 (0.4–1.6)   | 23               | 1.0 (0.6–1.4)  | 13                                   | 2.2 (1.3–3.7)*   | 42               | 1.4 (1.1–1.9)*     |

Abbreviation: SMR, standardized mortality ratio.

\* $P < 0.05$ ; \*\* $P < 0.01$ .

Mean daily doses of GH were 26.0  $\mu\text{g}/\text{kg}/\text{d}$  for the patients with isolated GH deficiency, 33.8  $\mu\text{g}/\text{kg}/\text{d}$  for those with idiopathic short stature, and 49.5  $\mu\text{g}/\text{kg}/\text{d}$  for those born small for gestational age.

The rising risk of cancer mortality in cancer patients in relation to daily GH dose was similar for each of the three cancer sites with sufficient deaths for such sub-analysis (Supplemental Table 2), and also separately in patients who were and were not known to have been treated with any radiotherapy, with craniospinal radiotherapy, and with chemotherapy (each based on limited data on these treatments), and in subgroups by time since starting GH treatment. Strong significant dose-response trends were seen in every subgroup, except where there were small numbers (not in Tables 1 through 5).

Examining site-specific cancer risks by duration since first GH treatment (Table 5), CNS tumor mortality decreased significantly ( $P < 0.001$ ) and HL incidence increased significantly ( $P = 0.001$ ), with longer follow-up. The decreasing CNS tumor trend derived from patients whose underlying diagnosis was cancer ( $P$  trend  $< 0.001$ ) and the HL trend from patients whose initial diagnosis was not cancer (a wide range of noncancer diagnoses;  $P$  trend = 0.002).

There was no indication that risk related to cumulative GH dose (Supplemental Table 3), except that CNS tumor mortality diminished with increasing dose in the cohort overall and bone cancer mortality diminished with increasing dose in patients with an initial diagnosis of cancer.

## Discussion

GH therapy is widely used, and a range of biological data suggest that hormone levels in the GH-IGF-1 axis may affect cancer risks (1, 2). It is therefore important clinically to determine whether cancer risks are raised by GH treatment. Information on this has been very limited, however. Generally, the larger studies have had short follow-up (10–13, 16) and the studies with long follow-up have been small. With the exception of two cohorts of patients treated with p-hGH (6, 18, 19), the only studies with mean follow-up of  $>6$  years have been a cohort examining solely leukemia as an outcome (5) and cohorts of a few hundred GH-treated cancer patients (7, 20).

This paucity of large-scale, long-term follow-up is important because with few exceptions [e.g., certain cancers after immunosuppression, several causes of leukemia (21)], most known causes of cancer act after a lag period of many years, and hence, short-term follow-up would give little information regarding risks after likely lag periods. Furthermore, most cancer types occur almost entirely in adulthood, so information on short-term cancer risks after childhood treatment (i.e., when the patient is still young) would be virtually uninformative about risks of these malignancies. There have been almost no published data by duration of follow-up (12), however, and none beyond 10 years. In our cohort, for patients with an initial diagnosis of cancer, there was no indication of rising risk of cancer incidence or mortality with longer follow-up. For patients with initial noncancer diagnoses, however, cancer incidence was significantly raised beyond

**Table 4. Cancer<sup>a</sup> Mortality and Incidence Risks, SAGhE Cohort, by Demographic and GH Treatment Variables, and Initial Diagnosis Leading to GH Treatment**

| Demographic or Treatment Variable       | All Initial Diagnoses, Total |                           |                               |                     | Initial Diagnosis Cancer |                           |                               |                        | Initial Diagnosis Noncancer |                           |                               |                    |
|-----------------------------------------|------------------------------|---------------------------|-------------------------------|---------------------|--------------------------|---------------------------|-------------------------------|------------------------|-----------------------------|---------------------------|-------------------------------|--------------------|
|                                         | Cancer Mortality             |                           | Cancer Incidence <sup>c</sup> |                     | Cancer Mortality         |                           | Cancer Incidence <sup>c</sup> |                        | Cancer Mortality            |                           | Cancer Incidence <sup>c</sup> |                    |
|                                         | n                            | SMR <sup>b</sup> (95% CI) | n                             | SMR (95% CI)        | n                        | SMR <sup>b</sup> (95% CI) | n                             | SMR (95% CI)           | n                           | SMR <sup>b</sup> (95% CI) | n                             | SMR (95% CI)       |
| Sex                                     |                              |                           |                               |                     |                          |                           |                               |                        |                             |                           |                               |                    |
| Male                                    | 138                          | 12.4<br>(10.5–14.6)***    | 52                            | 2.2<br>(1.7–2.9)*** | 131                      | 90.2<br>(76.0–107.0)***   | 30                            | 7.2<br>(5.0–10.3)***   | 7                           | 0.7<br>(0.3–1.5)          | 22                            | 1.1<br>(0.7–1.7)   |
| Female                                  | 113                          | 15.8<br>(13.1–19.0)***    | 86                            | 2.2<br>(1.8–2.7)*** | 99                       | 123.1<br>(101.1–149.9)*** | 42                            | 8.0<br>(5.9–10.8)***   | 14                          | 2.2<br>(1.3–3.7)*         | 44                            | 1.3<br>(1.0–1.7)   |
| Country                                 |                              |                           |                               |                     |                          |                           |                               |                        |                             |                           |                               |                    |
| Belgium                                 | 23                           | 22.1<br>(14.7–33.3)***    | 7                             | 1.9<br>(0.9–4.0)    | 20                       | 113.9<br>(73.5–176.6)***  | 3                             | 5.0<br>(1.6–15.4)*     | 3                           | 3.5<br>(1.1–10.8)*        | 4                             | 1.3<br>(0.5–3.5)   |
| France                                  | 88                           | 9.9<br>(8.1–12.2)***      | —                             | —                   | 79                       | 96.6<br>(77.5–120.5)***   | —                             | —                      | 9                           | 1.1<br>(0.6–2.2)          | —                             | —                  |
| Germany                                 | 10                           | 11.5<br>(6.2–21.4)***     | —                             | —                   | 9                        | 114.9<br>(59.8–220.9)***  | —                             | —                      | 1                           | 1.3<br>(0.0–7.0)          | —                             | —                  |
| Italy                                   | 1                            | 1.7<br>(0.0–9.4)          | —                             | —                   | 0                        | 0.0<br>(0.0–252.6)        | —                             | —                      | 1                           | 1.7<br>(0.0–9.6)          | —                             | —                  |
| The Netherlands                         | 27                           | 23.6<br>(16.2–34.5)***    | 22                            | 2.5<br>(1.6–3.8)*** | 26                       | 138.2<br>(94.1–203.0)***  | 14                            | 9.9<br>(5.8–16.7)***   | 1                           | 1.0<br>(0.0–5.8)          | 8                             | 1.1<br>(0.5–2.2)   |
| Sweden                                  | 30                           | 12.9<br>(9.0–18.5)***     | 50                            | 1.5<br>(1.2–2.0)**  | 27                       | 120.6<br>(82.7–175.9)***  | 21                            | 5.6<br>(3.6–8.6)***    | 3                           | 1.4<br>(0.5–4.4)          | 29                            | 1.0<br>(0.7–1.4)   |
| Switzerland                             | 6                            | 19.7<br>(8.8–43.7)***     | 2                             | 2.5<br>(0.6–10.1)   | 5                        | 168.4<br>(70.1–404.5)***  | 2                             | 31.0<br>(7.7–123.9)**  | 1                           | 3.6<br>(0.1–20.2)         | 0                             | 0.0<br>(0.0–5.1)   |
| United Kingdom                          | 66                           | 20.7<br>(16.3–26.4)***    | 57                            | 3.4<br>(2.6–4.4)*** | 64                       | 87.8<br>(68.7–112.1)***   | 32                            | 8.9<br>(6.3–12.6)***   | 2                           | 0.8<br>(0.2–3.3)          | 25                            | 1.9<br>(1.3–2.8)** |
| Age started treatment (y)               |                              |                           |                               |                     |                          |                           |                               |                        |                             |                           |                               |                    |
| 0–4                                     | 9                            | 7.1<br>(3.7–13.6)***      | 7                             | 1.7<br>(0.8–3.5)    | 8                        | 127.4<br>(63.7–254.7)***  | 4                             | 16.1<br>(6.1–43.0)***  | 1                           | 0.8<br>(0.0–4.6)          | 3                             | 0.8<br>(0.2–2.4)   |
| 5–9                                     | 70                           | 13.9<br>(11.0–17.6)***    | 46                            | 2.5<br>(1.8–3.3)*** | 65                       | 100.1<br>(78.5–127.7)***  | 18                            | 7.1<br>(4.5–11.3)***   | 5                           | 1.1<br>(0.5–2.7)          | 28                            | 1.7<br>(1.2–2.5)** |
| 10–14                                   | 149                          | 15.4<br>(13.1–18.0)***    | 71                            | 2.1<br>(1.7–2.6)*** | 137                      | 108.7<br>(91.9–128.5)***  | 42                            | 7.3<br>(5.4–9.9)***    | 12                          | 1.4<br>(0.8–2.5)          | 29                            | 1.0<br>(0.7–1.5)   |
| 15–19                                   | 23                           | 10.0<br>(6.6–15.0)***     | 14                            | 2.3<br>(1.4–3.9)**  | 20                       | 70.3<br>(45.4–109.0)***   | 8                             | 8.6<br>(4.3–17.2)***   | 3                           | 1.5<br>(0.5–4.6)          | 6                             | 1.2<br>(0.5–2.6)   |
| <i>P</i> trend                          |                              | 0.55                      |                               | 1.00                |                          | 0.30                      |                               | 0.71                   |                             | 0.53                      |                               | 0.44               |
| Time since started treatment (y)        |                              |                           |                               |                     |                          |                           |                               |                        |                             |                           |                               |                    |
| 0–4                                     | 103                          | 24.4<br>(20.1–29.6)***    | 25                            | 3.5<br>(2.4–5.2)*** | 100                      | 184.8<br>(151.9–224.8)*** | 20                            | 16.0<br>(10.3–24.9)*** | 3                           | 0.8<br>(0.3–2.5)          | 5                             | 0.9<br>(0.4–2.1)   |
| 5–9                                     | 78                           | 17.2<br>(13.8–21.5)***    | 21                            | 1.8<br>(1.2–2.8)*   | 71                       | 124.4<br>(98.6–157.0)***  | 12                            | 5.9<br>(3.4–10.5)***   | 7                           | 1.8<br>(0.8–3.7)          | 9                             | 0.9<br>(0.5–1.8)   |
| 10–14                                   | 37                           | 8.2<br>(6.0–11.4)***      | 47                            | 2.3<br>(1.8–3.1)*** | 33                       | 60.7<br>(43.2–85.4)***    | 24                            | 8.2<br>(5.5–12.2)***   | 4                           | 1.0<br>(0.4–2.7)          | 23                            | 1.3<br>(0.9–2.0)   |
| 15–19                                   | 25                           | 6.7<br>(4.5–9.8)***       | 30                            | 1.6<br>(1.1–2.3)*   | 19                       | 45.9<br>(29.3–71.9)***    | 11                            | 4.5<br>(2.5–8.2)***    | 6                           | 1.8<br>(0.8–4.0)          | 19                            | 1.2<br>(0.7–1.8)   |
| ≥20                                     | 8                            | 6.1<br>(3.1–12.3)***      | 15                            | 2.7<br>(1.7–4.6)**  | 7                        | 37.4<br>(17.8–78.4)***    | 5                             | 6.1<br>(2.5–14.7)**    | 1                           | 0.9<br>(0.0–5.0)          | 10                            | 2.2<br>(1.2–4.0)*  |
| <i>P</i> trend                          |                              | <0.001                    |                               | 0.13                |                          | <0.001                    |                               | 0.005                  |                             | 0.65                      |                               | 0.11               |
| Duration of treatment (y) <sup>d</sup>  |                              |                           |                               |                     |                          |                           |                               |                        |                             |                           |                               |                    |
| <3                                      | 118                          | 21.1<br>(17.6–25.3)***    | 40                            | 2.8<br>(2.1–3.9)*** | 110                      | 174.9<br>(145.1–210.8)*** | 25                            | 10.4<br>(7.1–15.5)***  | 8                           | 1.6<br>(0.8–3.2)          | 15                            | 1.3<br>(0.8–2.1)   |
| 3–6                                     | 80                           | 12.4<br>(10.0–15.5)***    | 52                            | 2.7<br>(2.1–3.5)*** | 74                       | 87.0<br>(69.3–109.3)***   | 29                            | 8.6<br>(6.0–12.4)***   | 6                           | 1.1<br>(0.5–2.4)          | 23                            | 1.4<br>(1.0–2.2)*  |
| ≥7                                      | 35                           | 7.5<br>(5.4–10.4)***      | 33                            | 1.9<br>(1.3–2.6)**  | 31                       | 50.2<br>(35.3–71.4)***    | 12                            | 4.0<br>(2.2–7.0)***    | 4                           | 1.0<br>(0.4–2.6)          | 21                            | 1.4<br>(0.9–2.2)   |
| <i>P</i> trend                          |                              | <0.001                    |                               | 0.07                |                          | <0.001                    |                               | 0.006                  |                             | 0.76                      |                               | 0.77               |
| Mean GH dose (μg/kg/d) <sup>d</sup>     |                              |                           |                               |                     |                          |                           |                               |                        |                             |                           |                               |                    |
| <20                                     | 37                           | 9.6<br>(7.0–13.3)***      | 18                            | 4.0<br>(2.6–6.4)*** | 35                       | 64.1<br>(46.0–89.3)***    | 12                            | 6.5<br>(3.7–11.4)***   | 2                           | 0.6<br>(0.2–2.4)          | 6                             | 2.3<br>(1.0–5.2)   |
| 20–29                                   | 94                           | 19.5<br>(15.9–23.8)***    | 40                            | 3.3<br>(2.4–4.4)*** | 89                       | 102.1<br>(82.9–125.6)***  | 26                            | 7.6<br>(5.2–11.2)***   | 5                           | 1.3<br>(0.5–3.0)          | 14                            | 1.6<br>(0.9–2.7)   |
| 30–39                                   | 52                           | 16.8<br>(12.8–22.0)***    | 41                            | 2.1<br>(1.6–2.9)*** | 50                       | 178.9<br>(135.6–236.1)*** | 19                            | 10.2<br>(6.5–16.0)***  | 2                           | 0.7<br>(0.2–2.8)          | 22                            | 1.3<br>(0.8–1.9)   |
| ≥40                                     | 7                            | 3.8<br>(1.8–8.0)**        | 11                            | 1.1<br>(0.6–2.0)    | 5                        | 101.5<br>(42.3–243.9)***  | 3                             | 5.0<br>(1.6–15.5)*     | 2                           | 1.1<br>(0.3–4.5)          | 8                             | 0.9<br>(0.4–1.7)   |
| <i>P</i> trend                          |                              | 0.39                      |                               | <0.001              |                          | <0.001                    |                               | 0.59                   |                             | 0.74                      |                               | 0.05               |
| Cumulative GH dose (mg/kg) <sup>d</sup> |                              |                           |                               |                     |                          |                           |                               |                        |                             |                           |                               |                    |
| <25                                     | 91                           | 14.9<br>(12.1–18.3)***    | 38                            | 3.4<br>(2.5–4.7)*** | 87                       | 108.8<br>(88.2–134.2)***  | 25                            | 9.9<br>(6.7–14.6)***   | 4                           | 0.8<br>(0.3–2.0)          | 13                            | 1.5<br>(0.9–2.6)   |
| 25–49                                   | 73                           | 16.9<br>(13.4–21.2)***    | 30                            | 2.1<br>(1.5–3.0)*** | 70                       | 108.1<br>(85.5–136.7)***  | 18                            | 6.6<br>(4.1–10.4)***   | 3                           | 0.8<br>(0.3–2.5)          | 12                            | 1.0<br>(0.6–1.8)   |
| 50–99                                   | 36                           | 11.1<br>(8.0–15.3)***     | 40                            | 2.3<br>(1.7–3.2)*** | 30                       | 79.5<br>(55.6–113.6)***   | 18                            | 6.8<br>(4.3–10.9)***   | 6                           | 2.1<br>(0.9–4.6)          | 22                            | 1.5<br>(1.0–2.3)   |

(Continued)

**Table 4. Continued**

| Demographic or Treatment Variable | All Initial Diagnoses, Total |                           |                               |                     | Initial Diagnosis Cancer |                           |                               |                      | Initial Diagnosis Noncancer |                           |                               |                  |
|-----------------------------------|------------------------------|---------------------------|-------------------------------|---------------------|--------------------------|---------------------------|-------------------------------|----------------------|-----------------------------|---------------------------|-------------------------------|------------------|
|                                   | Cancer Mortality             |                           | Cancer Incidence <sup>c</sup> |                     | Cancer Mortality         |                           | Cancer Incidence <sup>c</sup> |                      | Cancer Mortality            |                           | Cancer Incidence <sup>c</sup> |                  |
|                                   | n                            | SMR <sup>b</sup> (95% CI) | n                             | SMR (95% CI)        | n                        | SMR <sup>b</sup> (95% CI) | n                             | SMR (95% CI)         | n                           | SMR <sup>b</sup> (95% CI) | n                             | SMR (95% CI)     |
| ≥100                              | 3                            | 2.7<br>(0.9–8.3)          | 11                            | 1.6<br>(0.9–2.9)    | 2                        | 34.2<br>(8.6–136.9)**     | 5                             | 9.6<br>(4.0–23.1)*** | 1                           | 0.9<br>(0.0–5.3)          | 6                             | 1.0<br>(0.4–2.1) |
| <i>P</i> trend                    |                              | 0.003                     |                               | 0.02                |                          | 0.05                      |                               | 0.43                 |                             | 0.24                      |                               | 0.63             |
| Total                             | 251                          | 13.7<br>(12.1–15.5)***    | 138                           | 2.2<br>(1.9–2.6)*** | 230                      | 101.9<br>(89.6–116.0)***  | 72                            | 7.6<br>(6.1–9.6)***  | 21                          | 1.3<br>(0.9–2.0)          | 66                            | 1.2<br>(1.0–1.6) |

Abbreviation: SMR, standardized mortality ratio.

<sup>a</sup>All malignancies except nonmelanoma skin cancer.

<sup>b</sup>Using Swiss rates as expected for Germany and Belgian rates as expected for both France and the Netherlands for cancer sites for which sufficient detail was not available from home-country national rates.

<sup>c</sup>Excluding France, Germany, and Italy.

<sup>d</sup>Unknown, all initial diagnoses: duration of treatment mortality = 18, incidence = 13; mean GH dose mortality = 61, incidence = 28; cumulative GH dose mortality = 48, incidence = 19.

\* $P < 0.05$ ; \*\* $P < 0.01$ ; \*\*\* $P < 0.001$ .

20 years of follow-up and there was a highly significant increase in incidence with longer follow-up for HL incidence. For patients with isolated growth failure, separately, there were inconsistent findings based on modest numbers: significant trends of incidence with duration of treatment and time since first treatment, but not for mean dose ( $P = 0.52$ ), not clearly for cumulative dose ( $P = 0.08$ ), and not for cancer mortality. For Turner syndrome separately, there were no consistent or significant relations.

Potentially, the cancer risks in GH-treated patients could reflect the underlying condition leading to GH treatment, and the non-GH treatments (e.g., radiotherapy) given for this condition, as well as the effect of GH itself. This is clearest for patients receiving GH because of malignancy or chromosomal instability syndromes, but applies to some extent to virtually every underlying diagnosis, for example, hypopituitarism (9, 22) or Turner syndrome (23). The underlying diagnoses are numerous and heterogeneous, and we do not hold systematic information on the non-GH treatments, so we cannot give explanation of the results in relation to specific confounders. In principle, this might be overcome by comparing GH-treated patients with others with the same condition who had not received GH. This has been done in some studies for patients with underlying cancer (7, 24, 25). We did not have comparison data for untreated patients, however. Furthermore, this would not entirely solve the problem because selective factors leading to GH treatment may themselves cause differences in cancer risk between treated and untreated groups. Our analyses using general population rates to generate expectations need to be interpreted cautiously in this light.

High completeness of follow-up to a fixed end-date is critical if cohort study results are to be valid, especially for

safety assessment, because deficient follow-up can artifactually produce an apparent lack of raised risk. Previous large r-hGH cohorts, with one exception (16), have censored follow-up at last clinic visit, not at a fixed end-date (10, 12, 13, 26). Because frequency of medical contact depends on health status, this could be seriously biased. The large postmarketing surveillance studies (10–12, 14, 16) have also depended on active reporting of cancers to the pharmaceutical company by physicians, the completeness of which is unknown, especially after patients leave pediatric endocrine care. Our follow-up for mortality and cancer incidence, like that in the p-hGH cohorts (18, 19), was to a fixed end-date, and had high completeness through routine national data systems (15).

If GH affects cancer risk, one might expect dose- and duration-response relationships for risk. No data have been published on this, however: only statements of no relation for leukemia in one cohort (5) and for overall cancer risk in another (19). Our results did not suggest an increase in cancer mortality or incidence risks with increasing cumulative GH dose: Apparent decreases in risk with higher doses appeared to be largely or entirely an artifact of confounding by initial diagnosis, and apparent increases with shorter duration an artifact of stopping GH treatment because of cancer occurrence (see Results).

However, there was a significant increase in cancer mortality with increasing mean daily r-hGH dose for patients with previous cancer. Interpretation is uncertain. Favoring a causal explanation, the association was highly significant, so very unlikely to be due to chance; the results did not appear to be due to potentially confounding treatments such as craniospinal radiotherapy, as far as data were available to assess this, and the lack of similar associations for cancer incidence or for patients with initial noncancer diagnoses could be plausible if GH affects cancer



**Table 5. Cancer Mortality and Incidence Risks, Selected Cancer Sites, SAGHe Cohort, by Duration Since First Treatment and Initial Diagnosis Leading to GH Treatment**

| Cancer Site (Outcome), Duration Since First Treatment (y) | All Initial Diagnoses, Total |                           |                               |                    | Initial Diagnosis Cancer |                           |                               |                      | Initial Diagnosis Noncancer |                           |                               |                  |
|-----------------------------------------------------------|------------------------------|---------------------------|-------------------------------|--------------------|--------------------------|---------------------------|-------------------------------|----------------------|-----------------------------|---------------------------|-------------------------------|------------------|
|                                                           | Cancer Mortality             |                           | Cancer Incidence <sup>b</sup> |                    | Cancer Mortality         |                           | Cancer Incidence <sup>b</sup> |                      | Cancer Mortality            |                           | Cancer Incidence <sup>b</sup> |                  |
|                                                           | n                            | SMR <sup>a</sup> (95% CI) | n                             | SIR (95% CI)       | n                        | SMR <sup>a</sup> (95% CI) | n                             | SIR (95% CI)         | n                           | SMR <sup>a</sup> (95% CI) | n                             | SIR (95% CI)     |
| Colorectal cancer                                         |                              |                           |                               |                    |                          |                           |                               |                      |                             |                           |                               |                  |
| 0–9                                                       | 1                            | 10.2 (0.3–56.7)           | 2                             | 4.2 (1.1–16.9)*    | 1                        | 74.4 (1.9–414.4)*         | 2                             | 24.4 (6.1–97.6)**    | 0                           | 0.0 (0.0–43.5)            | 0                             | 0.0 (0.0–9.4)    |
| 10–19                                                     | 1                            | 2.7 (0.1–15.1)            | 2                             | 2.0 (0.5–7.9)      | 0                        | 0.0 (0.0–85.4)            | 0                             | 0.0 (0.0–24.7)       | 1                           | 3.1 (0.1–17.1)            | 2                             | 2.3 (0.6–9.3)    |
| 20–29                                                     | 0                            | 0.0 (0.0–45.2)            | 0                             | 0.0 (0.0–16.4)     | 0                        | 0.0 (0.0–319.9)           | 0                             | 0.0 (0.0–96.7)       | 0                           | 0.0 (0.0–52.6)            | 0                             | 0.0 (0.0–19.7)   |
| <i>P</i> trend                                            |                              | 0.25                      |                               | 0.25               |                          | 0.11                      |                               | 0.06                 |                             | 0.97                      |                               | 0.75             |
| Bone cancer                                               |                              |                           |                               |                    |                          |                           |                               |                      |                             |                           |                               |                  |
| 0–9                                                       | 9                            | 8.5 (4.4–16.3)***         | 5                             | 4.6 (1.9–11.0)*    | 7                        | 47.8 (22.8–100.3)***      | 3                             | 14.8 (4.8–45.9)**    | 2                           | 2.2 (0.5–8.7)             | 2                             | 2.3 (0.6–9.0)    |
| 10–19                                                     | 3                            | 4.6 (1.5–14.2)*           | 4                             | 6.8 (2.6–18.1)**   | 1                        | 13.3 (0.3–74.2)           | 2                             | 24.7 (6.2–98.8)**    | 2                           | 3.5 (0.9–13.8)            | 2                             | 3.9 (1.0–15.8)   |
| 20–29                                                     | 0                            | 0.0 (0.0–114.7)           | 0                             | 0.0 (0.0–86.2)     | 0                        | 0.0 (0.0–915.9)           | 0                             | 0.0 (0.0–561.5)      | 0                           | 0.0 (0.0–131.2)           | 0                             | 0.0 (0.0–101.8)  |
| <i>P</i> trend                                            |                              | 0.30                      |                               | 0.76               |                          | 0.19                      |                               | 0.82                 |                             | 0.76                      |                               | 0.74             |
| Melanoma                                                  |                              |                           |                               |                    |                          |                           |                               |                      |                             |                           |                               |                  |
| 0–9                                                       | 0                            | 0.0 (0.0–25.2)            | 2                             | 1.6 (0.4, 6.2)     | 0                        | 0.0 (0.0–178.8)           | 1                             | 4.3 (0.1–23.9)       | 0                           | 0.0 (0.0–29.4)            | 1                             | 0.9 (0.0–5.3)    |
| 10–19                                                     | 1                            | 2.1 (0.1–11.9)            | 7                             | 1.9 (0.9, 4.0)     | 0                        | 0.0 (0.0–65.6)            | 2                             | 3.8 (0.9–15.1)       | 1                           | 2.4 (0.1–13.6)            | 5                             | 1.6 (0.7–3.9)    |
| 20–29                                                     | 0                            | 0.0 (0.0–45.4)            | 3                             | 4.5 (1.4, 13.8)*   | 0                        | 0.0 (0.0–299.2)           | 2                             | 18.9 (4.7–75.6)*     | 0                           | 0.0 (0.0–53.5)            | 1                             | 1.8 (0.0–9.8)    |
| <i>P</i> trend                                            |                              | 0.86                      |                               | 0.25               |                          | —                         |                               | 0.22                 |                             | 0.86                      |                               | 0.64             |
| CNS                                                       |                              |                           |                               |                    |                          |                           |                               |                      |                             |                           |                               |                  |
| 0–9                                                       | 120                          | 62.9 (52.6–75.2)***       | 15                            | 6.2 (3.8–10.3)***  | 118                      | 503.2 (420.1–602.7)***    | 11                            | 29.3 (16.2–52.9)***  | 2                           | 1.2 (0.3–4.8)             | 4                             | 2.0 (0.7–5.2)    |
| 10–19                                                     | 32                           | 24.2 (17.1–34.3)***       | 13                            | 7.2 (4.2–12.4)***  | 31                       | 207.3 (145.8–294.8)***    | 11                            | 43.4 (24.0–78.3)***  | 1                           | 0.9 (0.0–4.8)             | 2                             | 1.3 (0.3–5.1)    |
| 20–29                                                     | 4                            | 22.9 (8.6–61.0)***        | 1                             | 4.7 (0.1–26.2)     | 4                        | 155.1 (58.2–413.3)***     | 1                             | 29.8 (0.8–165.9)     | 0                           | 0.0 (0.0–24.8)            | 0                             | 0.0 (0.0–20.6)   |
| <i>P</i> trend                                            |                              | <0.001                    |                               | 0.90               |                          | <0.001                    |                               | 0.43                 |                             | 0.64                      |                               | 0.47             |
| Thyroid                                                   |                              |                           |                               |                    |                          |                           |                               |                      |                             |                           |                               |                  |
| 0–9                                                       | 0                            | 0.0 (0.0–1284.3)          | 6                             | 10.9 (4.9–24.2)*** | 0                        | 0.0 (0.0–10035.5)         | 5                             | 51.3 (21.4–123.3)*** | 0                           | 0.0 (0.0–1472.7)          | 1                             | 2.2 (0.1–12.3)   |
| 10–19                                                     | 1                            | 78.1 (2.0–435.4)*         | 5                             | 4.1 (1.7–9.8)*     | 1                        | 772.6 (19.6–4304.7)**     | 4                             | 22.5 (8.4–59.9)***   | 0                           | 0.0 (0.0–320.7)           | 1                             | 1.0 (0.0–5.3)    |
| 20–29                                                     | 0                            | 0.0 (0.0–1393.9)          | 1                             | 4.4 (0.1–24.6)     | 0                        | 0.0 (0.0–10488.7)         | 1                             | 28.4 (0.7–158.1)     | 0                           | 0.0 (0.0–1607.5)          | 0                             | 0.0 (0.0–19.3)   |
| <i>P</i> trend                                            |                              | 0.98                      |                               | 0.14               |                          | 0.99                      |                               | 0.29                 |                             | —                         |                               | 0.41             |
| HL                                                        |                              |                           |                               |                    |                          |                           |                               |                      |                             |                           |                               |                  |
| 0–9                                                       | 0                            | 0.0 (0.0–17.0)            | 0                             | 0.0 (0.0–1.8)      | 0                        | 0.0 (0.0–123.2)           | 0                             | 0.0 (0.0–9.3)        | 0                           | 0.0 (0.0–19.8)            | 0                             | 0.0 (0.0–2.3)    |
| 10–19                                                     | 0                            | 0.0 (0.0–11.3)            | 6                             | 2.7 (1.2–6.0)*     | 0                        | 0.0 (0.0–95.4)            | 1                             | 2.9 (0.4–20.7)       | 0                           | 0.0 (0.0–12.8)            | 5                             | 2.6 (1.1–6.3)*   |
| 20–29                                                     | 0                            | 0.0 (0.0–119.2)           | 2                             | 9.6 (2.4–38.2)*    | 0                        | 0.0 (0.0–887.9)           | 0                             | 0.0 (0.0–116.5)      | 0                           | 0.0 (0.0–137.7)           | 2                             | 11.3 (2.8–45.1)* |
| <i>P</i> trend                                            |                              | —                         |                               | 0.001              |                          | —                         |                               | 0.40                 |                             | —                         |                               | 0.002            |
| Leukemia                                                  |                              |                           |                               |                    |                          |                           |                               |                      |                             |                           |                               |                  |
| 0–9                                                       | 20                           | 7.7 (5.0–11.9)***         | 4                             | 2.0 (0.8–5.4)      | 18                       | 55.7 (35.1–88.4)***       | 3                             | 8.8 (2.9–27.4)*      | 2                           | 0.9 (0.2–3.5)             | 1                             | 0.6 (0.0–3.4)    |
| 10–19                                                     | 7                            | 4.7 (2.3–9.9)**           | 3                             | 2.7 (0.9–8.4)      | 5                        | 29.9 (12.5–71.9)***       | 1                             | 6.2 (0.2–34.3)       | 2                           | 1.5 (0.4–6.1)             | 2                             | 2.1 (0.5–8.4)    |
| 20–29                                                     | 0                            | 0.0 (0.0–32.6)            | 0                             | 0.0 (0.0–30.5)     | 0                        | 0.0 (0.0–239.3)           | 0                             | 0.0 (0.0–186.3)      | 0                           | 0.0 (0.0–37.7)            | 0                             | 0.0 (0.0–36.5)   |
| <i>P</i> trend                                            |                              | 0.16                      |                               | 0.98               |                          | 0.10                      |                               | 0.63                 |                             | 0.74                      |                               | 0.47             |

Abbreviation: SMR, standardized mortality ratio.

<sup>a</sup>Using Swiss rates as expected for Germany, and Belgian rates as expected for both France and the Netherlands, for cancer sites for which sufficient detail was not available from home-country national rates.

<sup>b</sup>Excluding France, Germany, and Italy.

\* $P < 0.05$ ; \*\* $P < 0.01$ ; \*\*\* $P < 0.001$ .

survival rather than cancer occurrence. Against a causal explanation is the lack of relation of risk to increasing cumulative GH dose or treatment duration, and the existence of potential for confounding by underlying disease or non-GH treatment factors not captured by the relatively crude measures of these we had available. Further data are needed to resolve whether high GH doses affect cancer survival.

For the three cancer sites for which there is most published support for an association with IGF-1 levels—colorectum, breast, and prostate (2)—the evidence from our cohort and previously (9, 10, 18, 19) is too sparse to reach a conclusion on relations to GH treatment, reflecting the rarity of these cancers at childhood and young adult ages. Concerns about leukemia risk after GH were raised by case reports (5) and a significantly

raised risk in a cohort of p-hGH patients (6). However, others (19), and cohorts that excluded “high-risk” patients (11, 12), have found no excess, although several leukemias occurred in the high-risk group. In our cohort, there was a highly significant excess of leukemia incidence and mortality confined to patients with prior cancer. The data overall suggest that GH treatment does not substantially increase leukemia risk in patients without prior high risk, but leave it unclear whether risk is affected in high-risk individuals.

A cohort study of p-hGH patients found a significant excess of HL mortality (19). The only other cohort findings have been a nonsignificant excess (18), or deficit (12), based on small numbers. In our cohort, eight HL cases occurred, a nonsignificant excess, but there was a

highly significant trend with longer follow-up (although no trend with GH dose). The previous studies finding raised HL risk have been those with longest follow-up, so it remains possible that GH treatment at young ages may affect long-term HL risk.

Our cohort showed a significant raised bone cancer incidence in GH-treated patients, both those with and without an initial cancer diagnosis. Bone cancer has been one of the most common second primaries in previous childhood GH-treated cohorts (18, 24). The few risk analyses have been nonsignificant, based on very small numbers (12, 19). The three bone cancer deaths after isolated growth failure in our data were included in a French SAGhE publication (27), but the other bone cancer deaths, and all of the incident cases of bone cancer, were not. There was no evidence in our data that bone cancer risk was related to GH dose, but the significant bone cancer excess in both cancer and noncancer patients, and the anatomical and age distributions of bone cancer and association with height in the general population (28), argue that the relation needs reexamination in future data.

Bladder cancer risk was greatly and significantly ( $P = 0.002$ ) raised in patients without previous cancer, but based on small numbers. There appear to be no previous data about this and until such data are available, little weight can be put upon it.

We found significant excesses of incidence and mortality from cancers of the soft tissue, kidney, CNS, and thyroid, and of incidence of melanoma and cancer of the ovary and mortality from non-HL, all restricted to patients with cancer as the reason for GH treatment. Mainly, these are cancer sites for which raised risk of second cancer after radiotherapy and/or chemotherapy is well known (29, 30), although this does not preclude GH raising the risks further. Melanoma, however, is not a tumor usually raised after radiotherapy and chemotherapy, although it has been in at least one instance (31). Only for CNS tumors are there previous data on risks as a second malignancy after GH, with no raised risk relating to GH (25). An excess of CNS tumors has been found in patients treated with GH who did not have previous malignancy (12).

Our study had weaknesses, detailed further in ref. 15. We did not have information on GH treatment beyond pediatric ages, so we may have underestimated treatment duration for some patients with consequent dilution of any true effect of duration on cancer risk. Aggregation of data from eight countries adds the complexity of heterogeneity in patient mix and treatments, but without such a pooling the large numbers and hence statistical power of this study could not have been achieved. We did not have information on IGF-1 levels. In addition, although our follow-up was much longer than in previous large cohort

studies of childhood-treated patients (10–14), it still included few person-years beyond age 35, and hence had limited power for cancers prevalent at middle ages and older (and indeed for cancers prevalent at younger ages: even though the cohort is large, numbers of cases are often not large and therefore CIs tended to be wide). Interpretation of our data must therefore be cautious, and future longer follow-up of the cohort will be important. In Germany and Italy, ascertainment of GH-treated patients may have been substantially incomplete; in Italy, there was incompleteness in mortality follow-up; and in France and Italy, regulations and reimbursement rules gave incentives to prescribers to overstate isolated growth failure as an underlying diagnosis. These weaknesses seem unlikely to have biased the cancer analyses presented, however, as removal of France, Germany, and Italy from the analyses did not alter the conclusions.

Overall, our study, with much larger numbers of GH-treated patients followed long-term than previously, does not suggest that GH treatment affects the risk of cancer incidence or mortality for the outcomes and durations of follow-up for which our analyses have substantial data. The lack of increased risk with greater cumulative dose or duration of treatment, key variables for which data have not been published previously, makes a causal relation less likely. There was also no clear raised risk in patients with isolated growth failure. These factors argue against a major risk of cancer overall within the length of follow-up currently available. Nevertheless, continued vigilance during follow-up is desirable, both because of the lack of data for longer follow-up than in our study and because of the presence of some significant raised risks in the results. The rising cancer mortality with greater daily dose in cancer patients, however, leaves open the possibility of an effect on cancer survival. Also, the raised risks of bone and bladder cancers in patients with initial noncancer diagnoses and the rising risk of HL with longer follow-up in such patients leave possibilities of effects on site-specific cancer causation for which further data are needed.

## Acknowledgments

We gratefully acknowledge the assistance in all countries of the GH patients and their families. We also thank the following—in Belgium: Colienne de la Barre, Christine Derycke, and Siska Verlinde for collecting and verifying data; the members of the Belgian Society for Pediatric Endocrinology and Diabetology (BESPEED, previously BSGPE); the persons of the National Population Registry; the Federal and Regional Death Registries for their essential contribution sharing their data with us; and Professor Marc Maes. In France: Caroline Arnaud-Sarthou, Vean-Eng Ly, and Florentia Kaguelidou for their invaluable contributions; members of the French SAGhE study steering committee, Michel Andrejak (CHU d'Amiens), Juliette Bloch

(IVS), Anne Castot (AFSSAPS), Jean-Louis Chaussain (Académie de Médecine), Dominique Costagliola (INSERM), Nathalie Hoog-Labouret (INCa), Carmen Kreft-Jais (AFSSAPS), Anne Périllat (DGS), Béatrice Porokhov (AFSSAPS), and Catherine Rey-Quinio (AFSSAPS); all the physicians involved in the follow-up of patients and in the review process at Association France Hypophyse; and, in particular, those who contributed to the collection of data for the study. In Germany: the physicians and nurses caring for the GH patients and their families and Mandy Vogel (Leipzig). In Italy: Flavia Pricci (Rome), Cristina Fazzini (Rome), Pietro Pani (Rome), Giuseppe Scirè (Rome), Gian Luigi Spadoni (Rome), Franco Cavallo (Torino), Patrizia Matarazzo (Torino), Gianluca Aimaretti (Torino), and Laura Perrone (Napoli). In the Netherlands: Sandra de Zeeuw and Eefje Koopman for verifying data, the members of the Dutch Growth Hormone Advisory Board of the Dutch Society for Paediatrics, the registration teams of the Comprehensive Cancer Centre Netherlands and Comprehensive Cancer Centre South for the collection of data for the Netherlands Cancer Registry, the scientific staff of the Comprehensive Cancer Centre Netherlands, and all pediatric endocrinologists of the Advisory Group Growth Hormone involved in GH treatment of children. In Sweden: the statistician team led by Nils-Gunnar Pehrsson; the Board of the National Growth Hormone Registry; Kerstin Albertsson-Wikland, Stefan A. Aronson, Peter Bang, Jovanna Dahlgren, Maria Elfving, Jan Gustafsson, Lars Hagenäs, Anders Häger, Sten A. Ivarsson, Berit Kriström, Claude Marcus, Christian Moell, Karl Olof Nilsson, Svante Norgren, Martin Ritzen, Johan Svensson, Torsten Tuvemo, Ulf Westgren, Otto Westphal, Jan Åman, and all pediatric endocrinologists and pediatricians involved in the GH treatment of children for their assistance in collecting and verifying data. In Switzerland: Rahel Kuonen (Bern), U. Eiholzer (Zurich), J. Girard (Basel), S. Gschwendt (Zug), M. Hauschild (Lausanne), M. Janner (Bern), B. Kuhlmann (Aarau), D. L'Allemand (St. Gallen), U. Meinhardt (Zurich), P.-E. Mullis (Bern), F. Phan-Hug (Lausanne), E. Schoenle (Zurich), M. Steigert (Chur), U. Zumsteg (Basel), and R. Zurbrugg (Bienne). In the United Kingdom: the members of the British Society for Paediatric Endocrinology and Diabetes in the 21 historic UK Growth Centres for tracking down and contacting former and current patients, in particular, Justin Davies (Southampton), Jo Blair (Liverpool), Fiona Ryan (Oxford), Liz Crowne (Bristol), Savitha Shenoy (Leicester), Carlo Acerini (Cambridge), Jeremy Kirk (Birmingham), Tim Cheetham (Newcastle), Leo Dunkel (London Barts), Tabitha Randell (Nottingham), Sabah Alvi (Leeds), Neil Wright (Sheffield), Justin Warner (Cardiff), Amalia Mayo (Aberdeen), Guftar Shaikh (Glasgow), Louise Bath (Edinburgh); the Medicines for Children Research Network and the Scottish Medicines for Children Network, who supported the network of research nurses; the former Pfizer UK KIGS team for assistance in making electronic database records of treated patients available to the local investigators at each of the UK Growth Centres; and Sharon Squires (London).

Address all correspondence and requests for reprints to: Anthony J. Swerdlow, DSc, Division of Genetics and Epidemiology, Sir Richard Doll Building, Institute of Cancer

Research, Sutton, Surrey SM2 5NG, United Kingdom. E-mail: [anthony.swerdlow@icr.ac.uk](mailto:anthony.swerdlow@icr.ac.uk).

This work was supported in all countries by the European Union (HEALTH-F2-2009-223497); in addition, there was funding in Belgium from the Belgian Study Group for Paediatric Endocrinology (BSGPE); in France from the Agence Française de Sécurité Sanitaire des Produits de Santé (AFSSAPS, the French drug safety agency), Direction Générale de la Santé (DGS, French Ministry of Health), and Institut National du Cancer (INCa); in Italy from the EC European Commission (FP7-HEALTH-2007-3. 1-5); in Sweden from the Swedish Research Council, Regional University Hospital Grants (ALF), the Swedish Cancer Society, and the Swedish Childhood Cancer Foundation; in Switzerland from the Swiss Cancer League (KLS-02586-02-2010; KLS-2948-02-2012), Pfizer AG, Novo Nordisk Pharma AG, and Sandoz Pharmaceuticals AG; and in the United Kingdom, University College London, from the UK Child Growth Foundation.

Disclosure Summary: P.C. is a consultant for Merck Serono. L.S. is a member of the NordiNet International Study Committee (Novo Nordisk) and recipient of investigator-initiated independent research awards from Merck Serono (GGI award), NovoNordisk and Pfizer, and lecture honoraria from Ferring, Novo Nordisk, Pfizer, and Merck Serono. J.-C.C. is an investigator in clinical trials using GH sponsored by Pfizer and by Lilly and in postmarketing studies using several brands of GH, and support for travel to international meetings from several GH manufacturers. S.C. has received lecture fees from Ipsen, Merck Serono, Novo Nordisk, and Pfizer; research grants from Merck Serono, Eli Lilly, and Pfizer; and support for travel to international meetings from several GH manufacturers and is member of PRISM advisory board (Ipsen). W.K. is a member of the Novo Nordisk Advisory Board on GH treatment and has received lecture and consultancy honoraria from Pfizer, Ipsen, and Sandoz. A.T. has received lecture fees from Pfizer. All other authors declare that they have no conflict of interest.

## References

1. Swerdlow AJ. Does growth hormone therapy increase the risk of cancer? *Nat Clin Pract Endocrinol Metab.* 2006;2(10):530–531.
2. Clayton PE, Banerjee I, Murray PG, Renehan AG. Growth hormone, the insulin-like growth factor axis, insulin and cancer risk. *Nat Rev Endocrinol.* 2011;7(1):11–24.
3. Orme SM, McNally RJ, Cartwright RA, Belchetz PE; United Kingdom Acromegaly Study Group. Mortality and cancer incidence in acromegaly: a retrospective cohort study. *J Clin Endocrinol Metab.* 1998;83(8):2730–2734.
4. Baris D, Gridley G, Ron E, Weiderpass E, Mellekjær L, Ekblom A, Olsen JH, Baron JA, Fraumeni JF Jr. Acromegaly and cancer risk: a cohort study in Sweden and Denmark. *Cancer Causes Control.* 2002;13(5):395–400.
5. Nishi Y, Tanaka T, Takano K, Fujieda K, Igarashi Y, Hanew K, Hirano T, Yokoya S, Tachibana K, Saito T, Watanabe S. Recent status in the occurrence of leukemia in growth hormone-treated patients in Japan: GH Treatment Study Committee of the Foundation for Growth Science, Japan. *J Clin Endocrinol Metab.* 1999;84(6):1961–1965.
6. Fradkin JE, Mills JL, Schonberger LB, Wysowski DK, Thomson R, Durako SJ, Robison LL. Risk of leukemia after treatment with pituitary growth hormone. *JAMA.* 1993;270(23):2829–2832.

7. Ergun-Longmire B, Mertens AC, Mitby P, Qin J, Heller G, Shi W, Yasui Y, Robison LL, Sklar CA. Growth hormone treatment and risk of second neoplasms in the childhood cancer survivor. *J Clin Endocrinol Metab.* 2006;**91**(9):3494–3498.
8. Deodati A, Ferroli BB, Cianfarani S. Association between growth hormone therapy and mortality, cancer and cardiovascular risk: systematic review and meta-analysis. *Growth Horm IGF Res.* 2014;**24**(4):105–111.
9. Svensson J, Bengtsson BA, Rosén T, Odén A, Johannsson G. Malignant disease and cardiovascular morbidity in hypopituitary adults with or without growth hormone replacement therapy. *J Clin Endocrinol Metab.* 2004;**89**(7):3306–3312.
10. Child CJ, Zimmermann AG, Woodmansee WW, Green DM, Li JJ, Jung H, Erfurth EM, Robison LL; HypoCCS International Advisory Board. Assessment of primary cancers in GH-treated adult hypopituitary patients: an analysis from the Hypopituitary Control and Complications Study. *Eur J Endocrinol.* 2011;**165**(2):217–223.
11. Bell J, Parker KL, Swinford RD, Hoffman AR, Maneatis T, Lippe B. Long-term safety of recombinant human growth hormone in children. *J Clin Endocrinol Metab.* 2010;**95**(1):167–177.
12. Wilton P, Mattsson AF, Darendeliler F. Growth hormone treatment in children is not associated with an increase in the incidence of cancer: experience from KIGS (Pfizer International Growth Database). *J Pediatr.* 2010;**157**(2):265–270.
13. Gaillard RC, Mattsson AF, Akerblad AC, Bengtsson BÅ, Cara J, Feldt-Rasmussen U, Koltowska-Hägström M, Monson JP, Saller B, Wilton P, Abs R. Overall and cause-specific mortality in GH-deficient adults on GH replacement. *Eur J Endocrinol.* 2012;**166**(6):1069–1077.
14. Hartman ML, Xu R, Crowe BJ, Robison LL, Erfurth EM, Kleinberg DL, Zimmermann AG, Woodmansee WW, Cutler GB Jr, Chipman JJ, Melmed S; International HypoCCS Advisory Board. Prospective safety surveillance of GH-deficient adults: comparison of GH-treated vs untreated patients. *J Clin Endocrinol Metab.* 2013;**98**(3):980–988.
15. Swerdlow AJ, Cooke R, Albertsson-Wikland K, Borgström B, Butler G, Cianfarani S, Clayton P, Coste J, Deodati A, Ecosse E, Gausche R, Giacomozzi C, Kiess W, Hokken-Koelega AC, Kuehni CE, Landier F, Maes M, Mullis PE, Pfaffle R, Säwendahl L, Sommer G, Thomas M, Tollerfield S, Zandwijken GR, Carel JC. Description of the SAGhE Cohort: a large European study of mortality and cancer incidence risks after childhood treatment with recombinant growth hormone. *Horm Res Paediatr.* 2015;**84**(3):172–183.
16. Tuffli GA, Johanson A, Rundle AC, Allen DB. Lack of increased risk for extracranial, nonleukemic neoplasms in recipients of recombinant deoxyribonucleic acid growth hormone. *J Clin Endocrinol Metab.* 1995;**80**(4):1416–1422.
17. Breslow NE, Day NE. Statistical methods in cancer research: Volume I: the analysis of case-control studies. *IARC Sci Publ.* 1980; (32):5–338.
18. Mills JL, Schonberger LB, Wysowski DK, Brown P, Durako SJ, Cox C, Kong F, Fradkin JE. Long-term mortality in the United States cohort of pituitary-derived growth hormone recipients. *J Pediatr.* 2004;**144**(4):430–436.
19. Swerdlow AJ, Higgins CD, Adlard P, Preece MA. Risk of cancer in patients treated with human pituitary growth hormone in the UK, 1959–85: a cohort study. *Lancet.* 2002;**360**(9329):273–277.
20. Mackenzie S, Craven T, Gattamaneni HR, Swindell R, Shalet SM, Brabant G. Long-term safety of growth hormone replacement after CNS irradiation. *J Clin Endocrinol Metab.* 2011;**96**(9):2756–2761.
21. Linet MS, Devesa SS, Morgan GR. The leukemias. In: Schottenfeld D, Fraumeni JF Jr, eds. *Cancer Epidemiology and Prevention.* 3rd ed. Oxford, United Kingdom: Oxford University Press; 2006. 10.1093/acprof:oso/9780195149616.003.0044.
22. Stochholm K, Gravholt CH, Laursen T, Laurberg P, Andersen M, Kristensen LØ, Feldt-Rasmussen U, Christiansen JS, Frydenberg M, Green A. Mortality and GH deficiency: a nationwide study. *Eur J Endocrinol.* 2007;**157**(1):9–18.
23. Schoemaker MJ, Swerdlow AJ, Higgins CD, Wright AF, Jacobs PA, Group UKCC; UK Clinical Cytogenetics Group. Cancer incidence in women with Turner syndrome in Great Britain: a national cohort study. *Lancet Oncol.* 2008;**9**(3):239–246.
24. Sklar CA, Mertens AC, Mitby P, Occhiogrosso G, Qin J, Heller G, Yasui Y, Robison LL. Risk of disease recurrence and second neoplasms in survivors of childhood cancer treated with growth hormone: a report from the Childhood Cancer Survivor Study. *J Clin Endocrinol Metab.* 2002;**87**(7):3136–3141.
25. Patterson BC, Chen Y, Sklar CA, Neglia J, Yasui Y, Mertens A, Armstrong GT, Meadows A, Stovall M, Robison LL, Meacham LR. Growth hormone exposure as a risk factor for the development of subsequent neoplasms of the central nervous system: a report from the childhood cancer survivor study. *J Clin Endocrinol Metab.* 2014;**99**(6):2030–2037.
26. van Bunderen CC, van Nieuwpoort IC, Arwert LI, Heymans MW, Franken AA, Koppeschaar HP, van der Lely AJ, Drent ML. Does growth hormone replacement therapy reduce mortality in adults with growth hormone deficiency? Data from the Dutch National Registry of Growth Hormone Treatment in adults. *J Clin Endocrinol Metab.* 2011;**96**(10):3151–3159.
27. Carel JC, Ecosse E, Landier F, Meguellati-Hakkas D, Kaguelidou F, Rey G, Coste J. Long-term mortality after recombinant growth hormone treatment for isolated growth hormone deficiency or childhood short stature: preliminary report of the French SAGhE study. *J Clin Endocrinol Metab.* 2012;**97**(2):416–425.
28. Mirabello L, Pfeiffer R, Murphy G, Daw NC, Patiño-García A, Troisi RJ, Hoover RN, Douglass C, Schüz J, Craft AW, Savage SA. Height at diagnosis and birth-weight as risk factors for osteosarcoma. *Cancer Causes Control.* 2011;**22**(6):899–908.
29. Van Leeuwen FE, Travis LB. Second cancers. In: DeVita VT Jr, Hellman S, Rosenberg SA, eds. *Cancer. Principles and Practice of Oncology.* Philadelphia, PA: Lippincott Williams & Wilkins; 2005.
30. Curtis RE, Freedman DM, Ron E, Ries LAG, Hacker DG, Edwards BK, Tucker MA, Fraumeni JF Jr. New malignancies among cancer survivors: SEER Cancer Registries, 1973–2000. Bethesda, MD: National Cancer Institute, NIH Publ. No 05-5302. 2006.
31. Swerdlow AJ, Higgins CD, Smith P, Cunningham D, Hancock BW, Horwich A, Hoskin PJ, Lister TA, Radford JA, Rohatiner AZ, Linch DC. Second cancer risk after chemotherapy for Hodgkin's lymphoma: a collaborative British cohort study. *J Clin Oncol.* 2011;**29**(31):4096–4104.
